# Supplementary material for: Loss of tumor cell MHC class II drives MAPK inhibitor insensitivity of BRAF-mutant anaplastic thyroid cancers
Source: JCI journal article supplement (doi:10.1172/jci191781), 2025-08-19
Supplement: sd1 [file 1]

## Supplementary Material

### Loss of tumor cell MHC Class II drives MAPK-inhibitor insensitivity of BRAF-mutant anaplastic thyroid cancers

Vera Tiedje<sup>1</sup>, Jillian Greenberg<sup>1</sup>, Tianyue Qin<sup>1</sup>, Soo-Yeon Im<sup>1</sup>, Gnana P. Krishnamoorthy<sup>1</sup>, Laura Boucai<sup>2</sup>, Bin Xu<sup>3</sup>, Jena D. French<sup>4,5</sup>, Eric J Sherman<sup>2</sup>, Alan L Ho<sup>2</sup>, Elisa de Stanchina<sup>6</sup>, Nicholas D. Socci<sup>7</sup>, Jian Jin<sup>8</sup>, Ronald A. Ghossein<sup>3</sup>, Jeffrey A. Knau<sup>1,9</sup>, Richard P Koche<sup>10</sup>, James A. Fagin<sup>1,2</sup>

<sup>1</sup> Human Oncology and Pathogenesis Program, Memorial Sloan Kettering Cancer Center, New York, New York, USA.

<sup>2</sup> Department of Medicine, Memorial Sloan Kettering Cancer Center (MSKCC), New York, 10065, USA.

<sup>3</sup> Department of Pathology and Laboratory Medicine, Memorial Sloan Kettering Cancer Center, New York, NY, USA.

<sup>4</sup> Department of Medicine, Division of Endocrinology, Metabolism, and Diabetes, University of Colorado Denver, Aurora, CO, USA. jena.french@CUanschutz.edu.

<sup>5</sup> University of Colorado Cancer Center, University of Colorado Denver, Aurora, CO, USA.

<sup>6</sup> Antitumor Assessment Core Facility, Memorial Sloan Kettering Cancer Center, New York, New York, USA.

<sup>7</sup> Bioinformatics Core, Memorial Sloan Kettering Cancer Center, New York, NY, USA.

<sup>8</sup> Mount Sinai Center for Therapeutics Discovery, Departments of Pharmacological Sciences, Oncological Sciences and Neuroscience, Tisch Cancer Institute, Icahn School of Medicine at Mount Sinai, New York, New York, USA.

<sup>9</sup> Lerner Research Institute, Cleveland Clinic, Cleveland, Ohio, USA.

<sup>10</sup> Center for Epigenetics Research, Memorial Sloan Kettering Cancer Center, New York, New York, USA.

Corresponding Author:

James A. Fagin

Human Oncology and Pathogenesis Program

Memorial Sloan Kettering Cancer Center

1275 York Avenue, New York, NY 10065.

Phone: +1 646-608-2917

E-mail: [faginj@mskcc.org](mailto:faginj@mskcc.org)

Conflict of interest statement: The authors declare no conflicts of interest with this work.

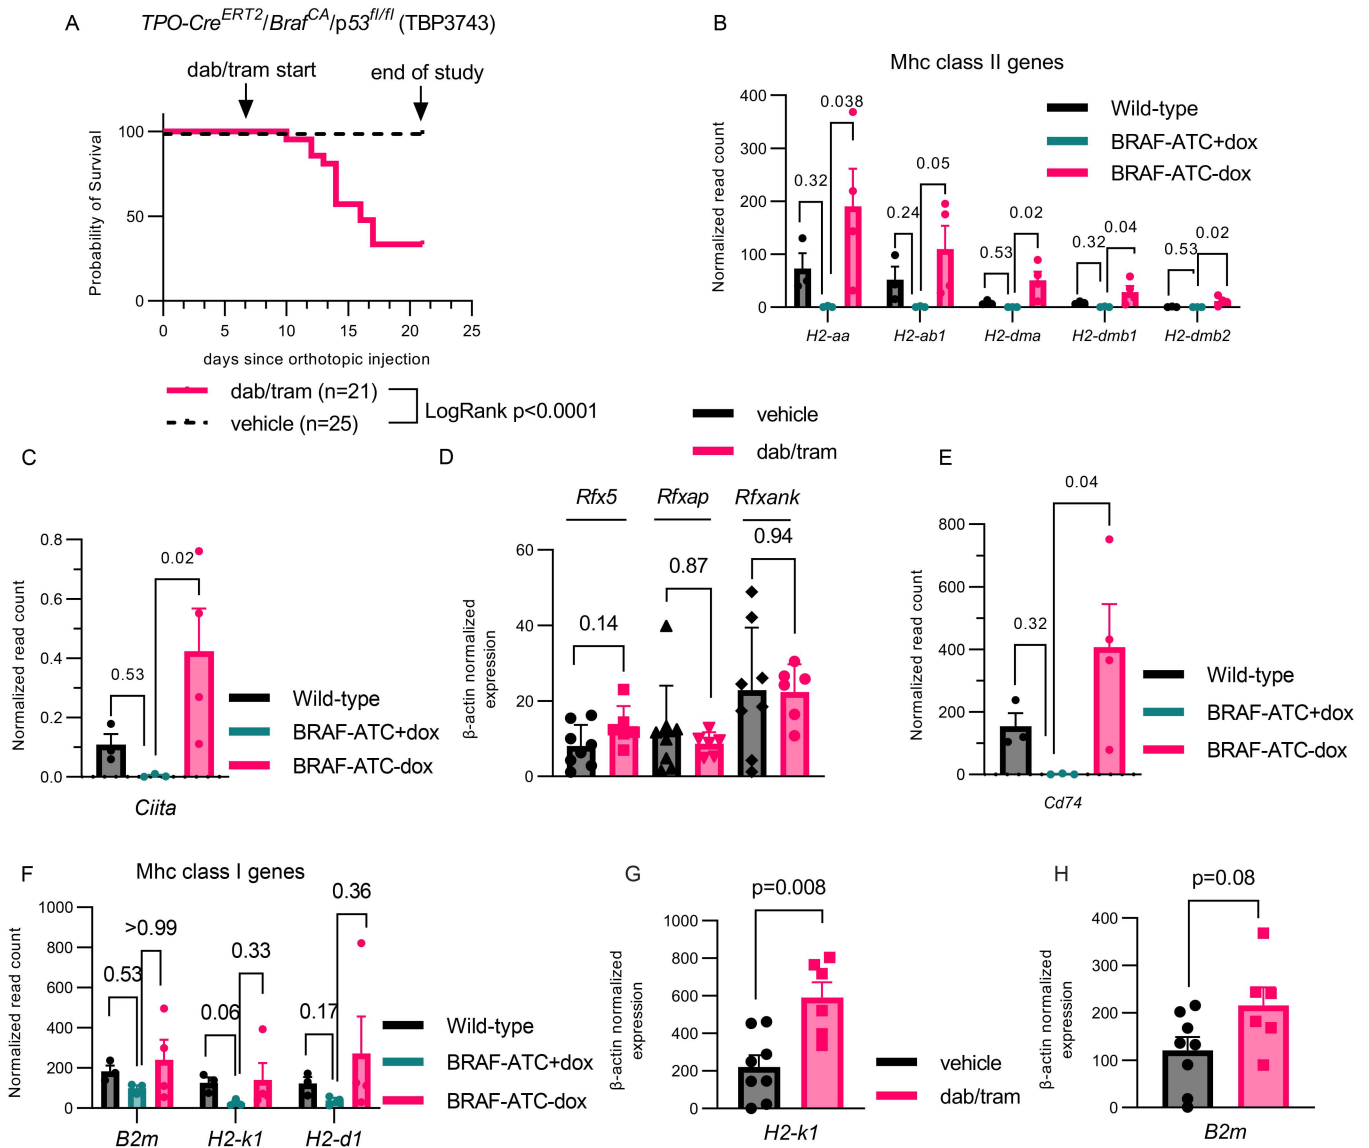

Supplementary Figure 1: A) Kaplan Meier analysis of survival of mice with orthotopic *Braf/p53* ATCs treated with vehicle or dab/tram 1 week after TBP3743 ATC cell injection. B) Expression of MhcII complex genes is low or absent in WT thyrocytes, low in BRAF/p53-ATC cells and induced by dox withdrawal. C) *Ciita* expression in WT thyrocytes and in ATC cells prior to or after dox withdrawal. D) Quantitative RT-PCR of the MhcII-related transcription factors *Rfx5*, *Rfxap* and *Rfxank* is not impacted by dab/tram treatment in the orthotopic *Braf/p53* model. E) *Cd74* expression in WT thyrocytes and in ATC cells prior to or after dox withdrawal. F) Expression of MhcI genes in WT thyrocytes or ATC cells prior to or after dox withdrawal. G and H) RT-PCR of *H2-k1* and *B2m* mRNAs in sorted thyrocytes from *Braf/p53* orthotopic ATCs treated with vehicle or dab/tram in vivo for 4 days. Log-rank (Mantel-Cox) test (A), Kruskal Wallis Test (B, C, E and F) Multiple Mann-Whitney tests (D, G and H). Bars represent SEM. ATC: Anaplastic thyroid cancer; IFN $\gamma$ : Interferon  $\gamma$ ; GEMM: Genetic engineered mouse model; dab/tram: Dabrafenib and trametinib; *Ciita*: Class II major histocompatibility complex transactivator; WT: wild type; SEM: Standard error of the mean.

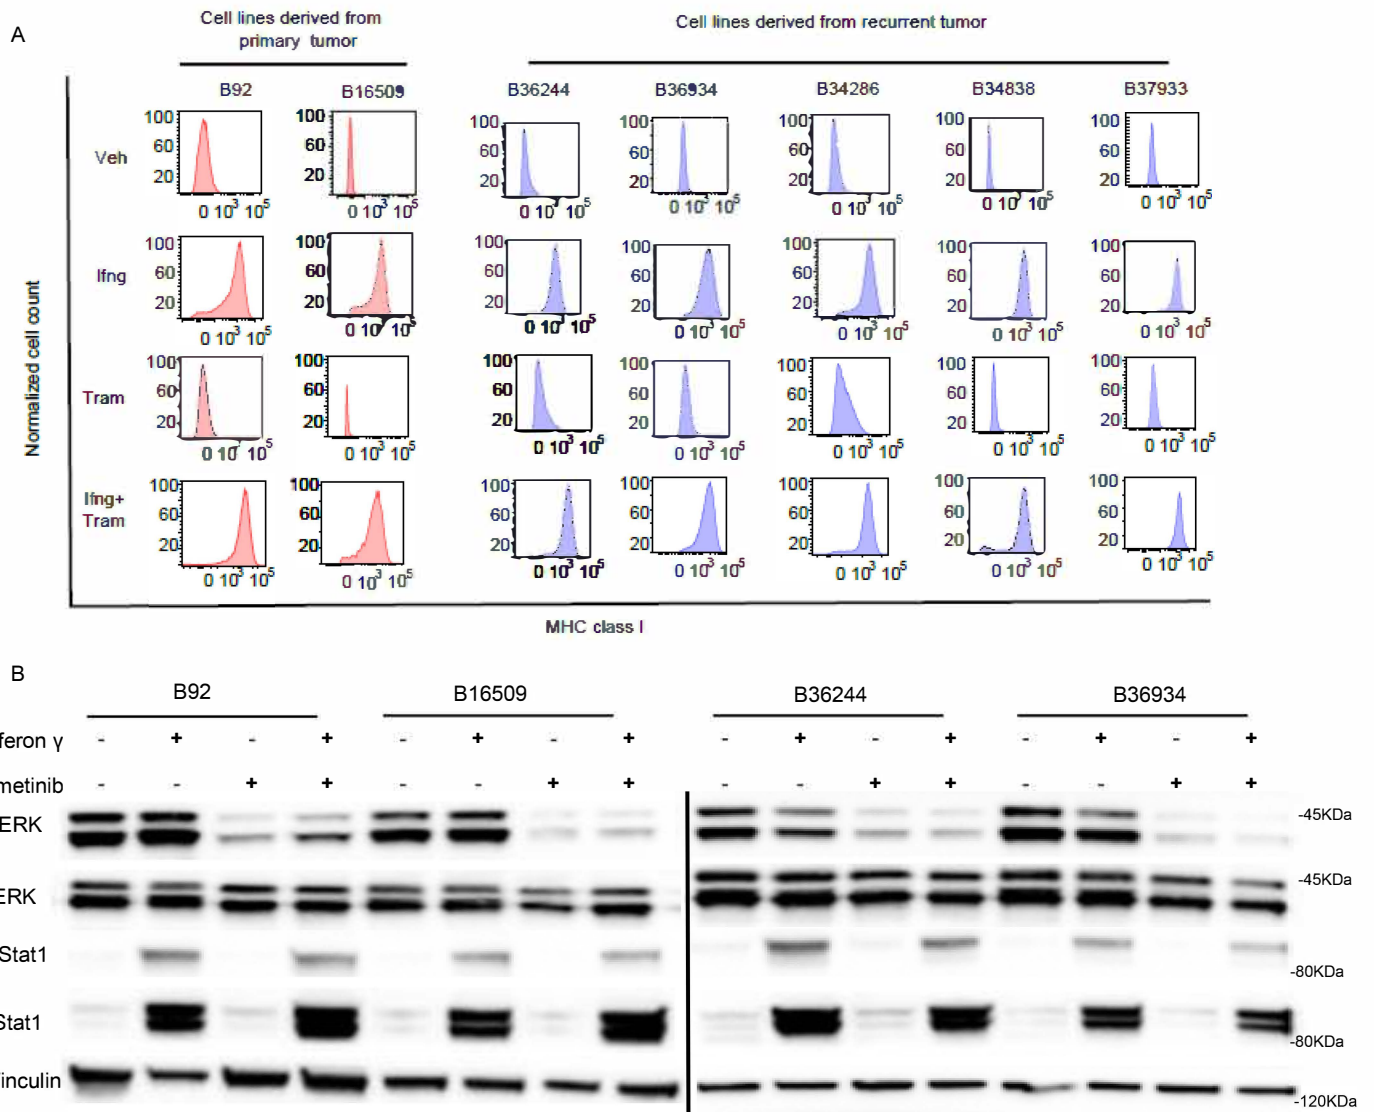

Supplementary Figure 2: A) Induction of Mhcl by IFN $\gamma$  (20ng/ml) as determined by FACS in two primary cell lines derived from primary ATCs on dox diet (B92 and B16509) and five lines derived from recurrent tumors developing after dox withdrawal (B36244, B36934, B34286, B34838 and B37933). Addition of trametinib (10nM) does not significantly augment the IFN $\gamma$  (20ng/ml) effect. B) Western blot of B92, B16509, B36244, B36934 cell lysates treated with trametinib alone or in combination with IFN $\gamma$  for 96 h for the indicated proteins. IFN $\gamma$ : Interferon  $\gamma$ ; dox: doxycycline.

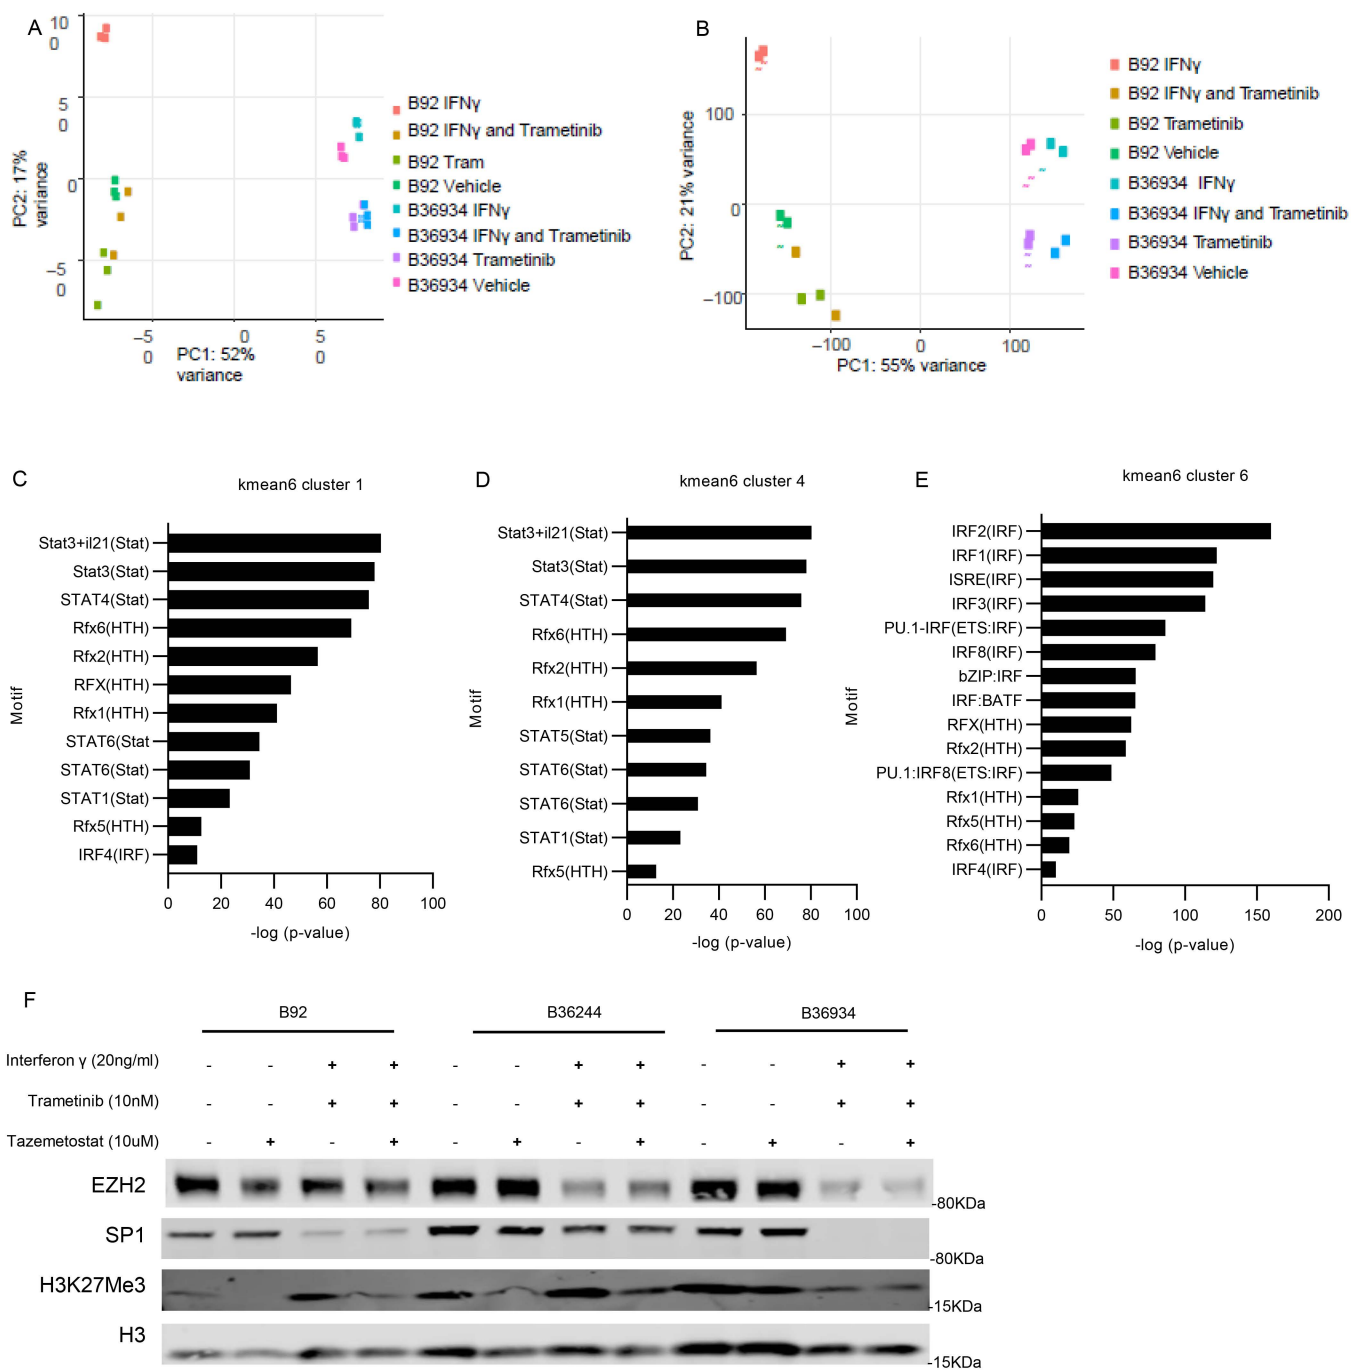

Supplementary Figure 3: A,B) Principal component analyses of RNA Seq and ATAC-Seq for the B92 primary and the B36934 recurrent ATC lines displaying triplicates and duplicates, respectively, for each treatment condition (DMSO, IFN $\gamma$  (20ng/ml), trametinib (10nM) and the combination of IFN $\gamma$  + trametinib (10nM) for 96 h. C–E) TF motifs of members of the Rfx, Stat and Irf families enriched in kmeans clusters 1, 4 and 6 identified using HOMER *de novo* motif discovery. F) Western blot for EZH2, Sp1, H3K27Me3 and H3 for the indicated cell lines and treatment conditions. IFN $\gamma$ : Interferon  $\gamma$ ; tram: trametinib; TF: transcription factor.

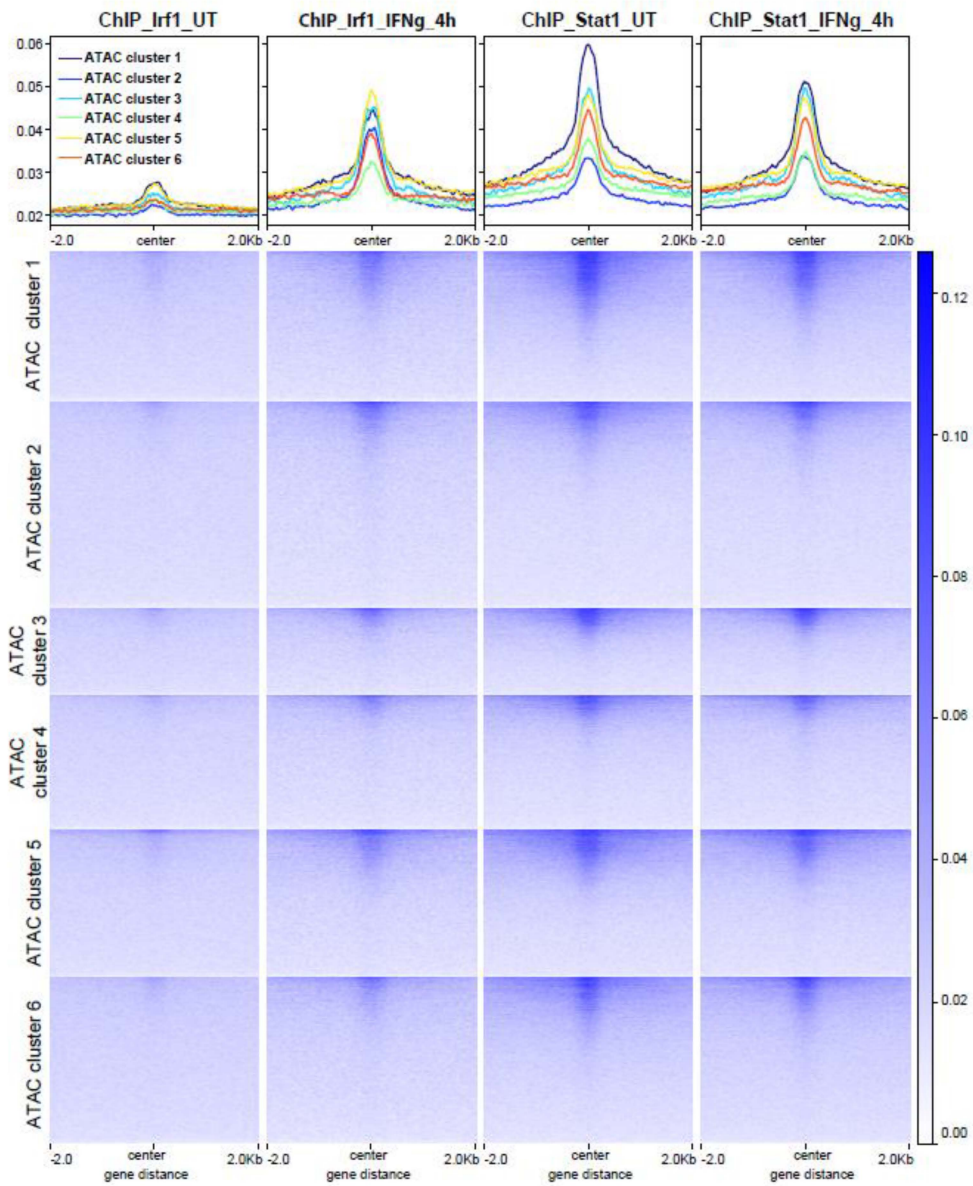

Supplementary Figure 4: Tornado plots of averaged Stat1 and Irf1 transcription factor binding sites in the respective k-means clusters.

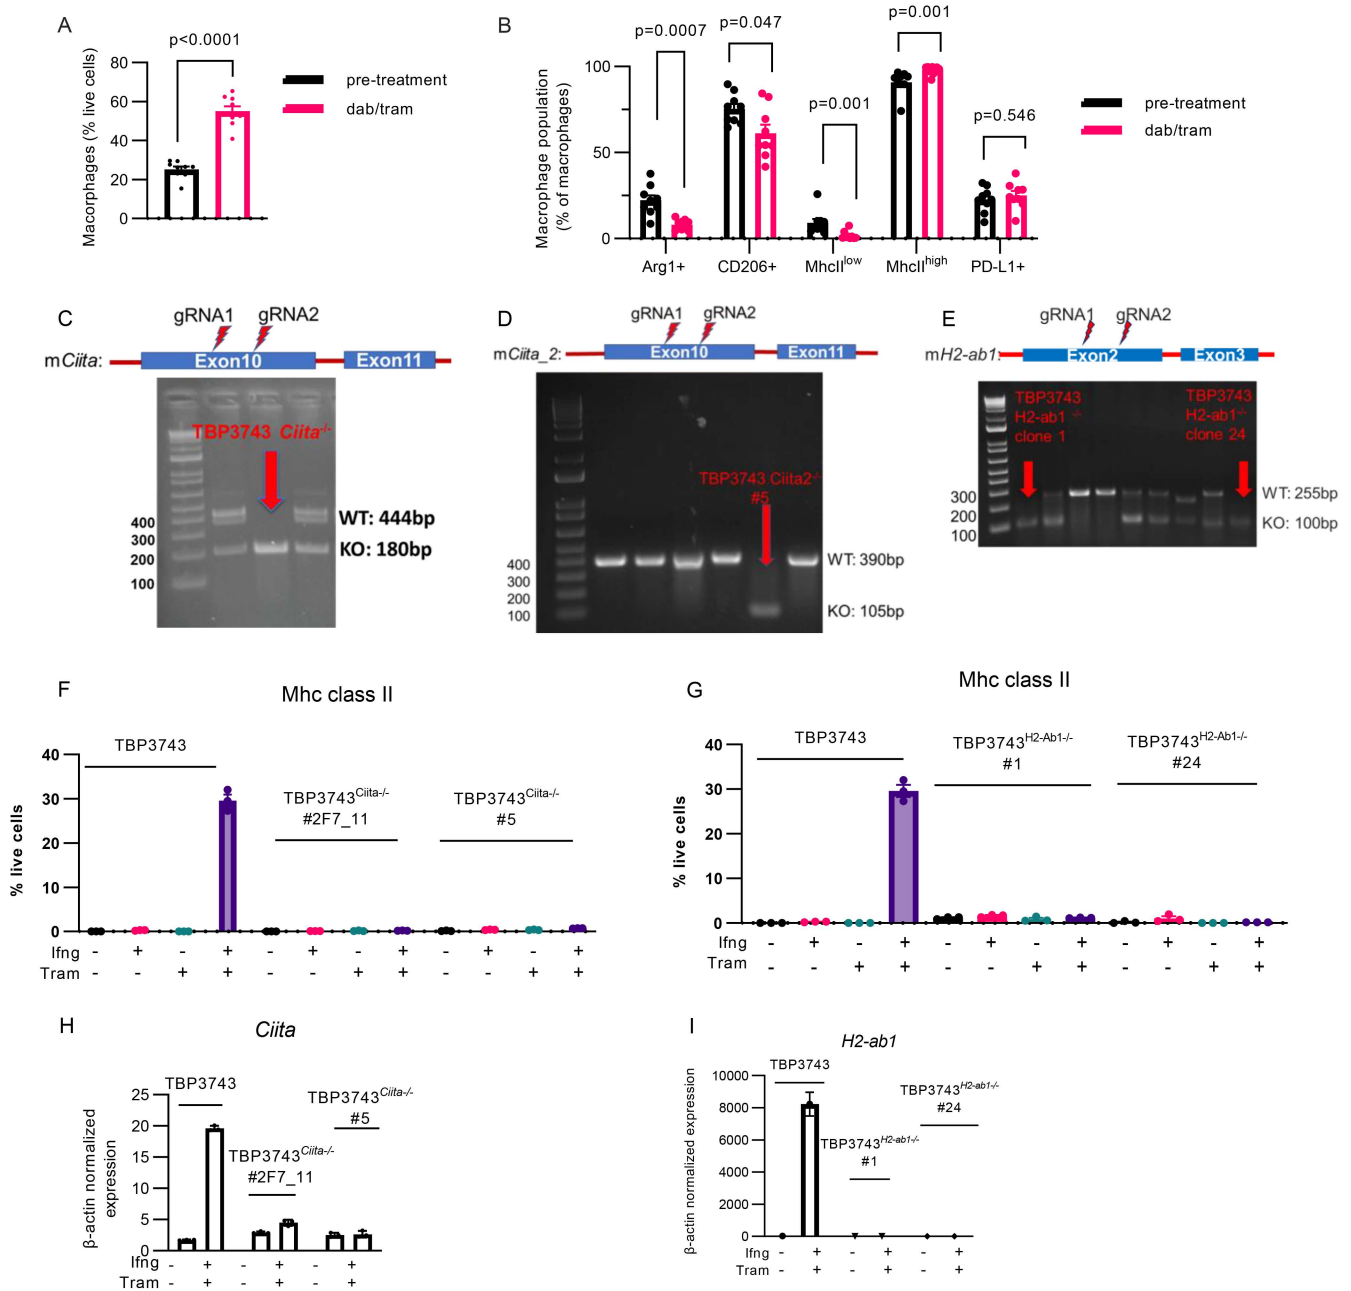

Supplementary Figure 5: A, B) Analysis of infiltrating macrophages by flow cytometry in orthotopic Braf/p53 ATC at baseline and 5 days after treatment with dab/tram. C, D) Top: Schema of two different gRNA pairs targeting Exon 10 for CRISPR KO of *Ciita*. Bottom: Image of gel electrophoresis of PCR products from the indicated CRISPR KO clones. E) Top: Schema for gRNA pair targeting exon2 of *H2-ab1* for generation of CRISPR KO clones. Bottom: Image of gel electrophoresis of PCR products of two homozygous *H2-ab1* KO clones. F, G) Loss of IFN $\gamma$  and trametinib-induced MhclI in the *Ciita* CRISPR KO clones 2F7\_11 and 5 and *H2-ab1* CRISPR KO clones 2 and 24, all derived from TBP3743 cells. MhclI was measured by FACS 96h after treatment with the indicated conditions. H, I) Quantitative RT-PCR of *Ciita* mRNA in parental and *Ciita*<sup>-/-</sup> clones and *H2-ab1* mRNA in parental and *H2-ab1*<sup>-/-</sup> clones. gRNA: guide RNA; IFN $\gamma$ : Interferon  $\gamma$ ; *Ciita*: Class II major histocompatibility complex transactivator.

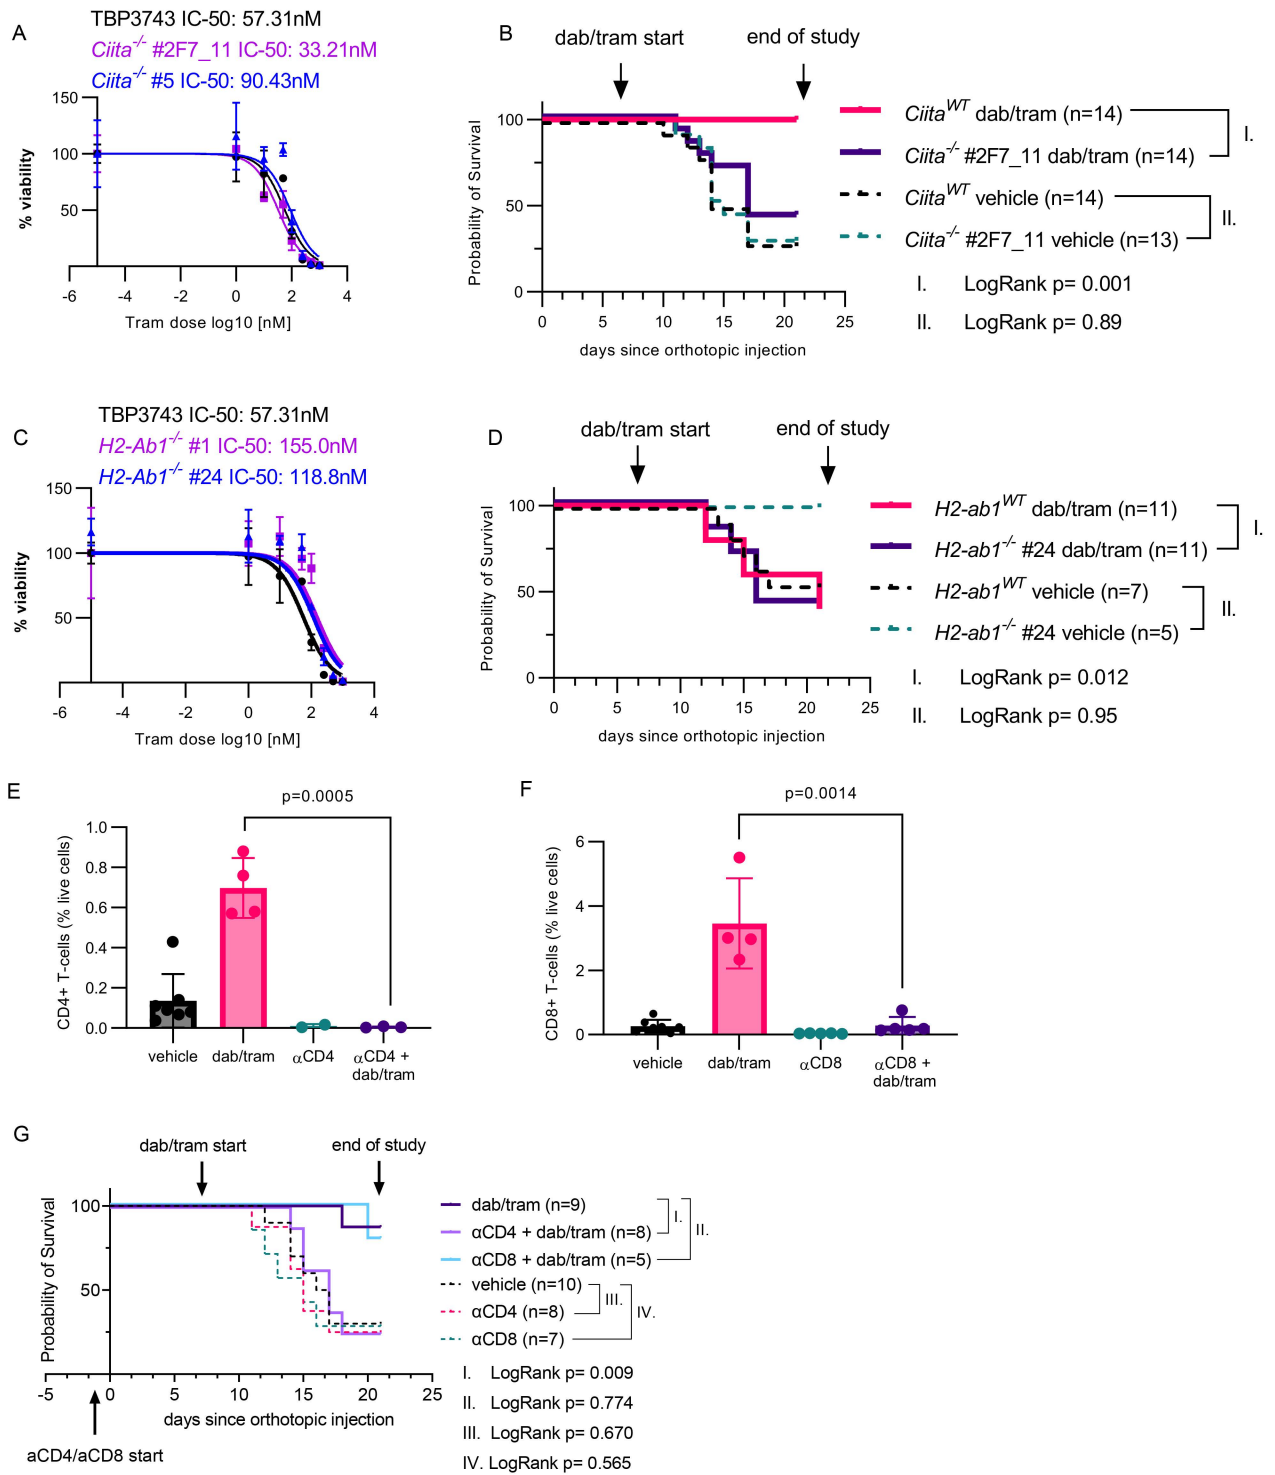

Supplementary Figure 6: A, C) IC50 for trametinib in parental, *Ciita*<sup>-/-</sup> clones 2F7\_11 and 5 and *H2-ab1*<sup>-/-</sup> clones 1 and 24. B, D) Kaplan Meier analysis of survival of mice with orthotopic *Braf*/*p53* ATCs, treated with vehicle or dab/tram for 1 week after orthotopic injection of TBP3743 parental or *Ciita*<sup>-/-</sup> or *H2-ab1*<sup>-/-</sup> ATC cells. E) and F) CD4<sup>+</sup> (E) and CD8<sup>+</sup> T-cells (F) percentage of live cells in thyroids harvested from mice treated with in the indication conditions. G) Kaplan Meier analysis of survival of mice with orthotopic *Braf*/*p53* ATCs in the indicated treatment conditions. Tram: trametinib. dab/tram: dabrafenib and trametinib. *Ciita*: Class II major histocompatibility complex transactivator.

## Supplementary Tables

Table 1 Tumor mutational burden in human and murine papillary and anaplastic thyroid cancer

Table 2 Whole exome sequencing results: High confidence Maf

Table 3 Antibodies for IHC, IF, FACS and WB

Table 4 CrisprKO gRNA Sequences

Table 5 Primers

### Supplementary Table 1

|                    | Human ATC         | Murine ATC      |
|--------------------|-------------------|-----------------|
| Mutation per tumor | 23.7 <sup>1</sup> | 22 <sup>3</sup> |
|                    | 24 <sup>2</sup>   |                 |

#### Reference

<sup>1</sup>Kunstman et al 2015 (28)

<sup>2</sup>Ravi et al 2019 (29)

<sup>3</sup>Knauf et al 2018 (26)

**Supplementary Table 3**

| Antibody                                                                | Clone       | Source         | Target Species |
|-------------------------------------------------------------------------|-------------|----------------|----------------|
| HLA-DR                                                                  | TAL 1B5     | Santa Cruz     | human          |
| Pan Cytokeratin                                                         | na          | Thermo Fisher  | human          |
| CD8                                                                     | 4B11        | Thermo Fisher  | human          |
| CD3                                                                     | SP7         | Abcam          | human          |
| CD163                                                                   | 10D6        | Abcam          | human          |
| CD68                                                                    | KP1         | Abcam          | human          |
| CD15                                                                    | MMA         | Abcam          | human          |
| BUV395 Rat Anti-Mouse CD45                                              | 30-F11      | BD Biosciences | mouse          |
| BV510 Rat Anti-CD11b                                                    | M1/70       | BD Biosciences | mouse          |
| BV750 Rat Anti-Mouse Siglec-F                                           | E50-2440    | BD Biosciences | mouse          |
| FITC Rat Anti-Mouse CD3                                                 | 17A2        | BD Biosciences | mouse          |
| BUV805 Rat Anti-Mouse CD8a                                              | 53-6.7      | BD Biosciences | mouse          |
| BUV661 Mouse Anti-Mouse NK-1.1                                          | PK136       | BD Biosciences | mouse          |
| PerCP anti-mouse Ly-6G Antibody                                         | 1A8         | Biolegend      | mouse          |
| Brilliant Violet 711™ anti-mouse CD11c Antibody                         | N418        | Biolegend      | mouse          |
| Spark Blue™ 550 anti-mouse I-A/I-E Antibody                             | M5/114.15.2 | Biolegend      | mouse          |
| Brilliant Violet 650™ anti-mouse F4/80 Antibody                         | BM8         | Biolegend      | mouse          |
| Brilliant Violet 570™ anti-mouse CD4 Antibody                           | RM4-5       | Biolegend      | mouse          |
| Spark NIR™ 685 anti-mouse/human CD45R/B220 Antibody                     | RA3-6B2     | Biolegend      | mouse          |
| APC-Cy™7 Rat Anti-Mouse Ly-6C                                           | AL-21       | BD Biosciences | mouse          |
| Arginase 1 Monoclonal Antibody PerCP-eFluor™ 710 <sup>1</sup>           | A1exF5      | Thermo Fisher  | mouse          |
| FOXP3 Monoclonal Antibody eFluor™ 450 <sup>1</sup>                      | FJK-16s     | Thermo Fisher  | mouse          |
| CD274 (PD-L1, B7-H1) Super Bright™ 436                                  | MIH5        | Thermo Fisher  | mouse          |
| BV605 Rat Anti-Mouse I-A/I-E                                            | M5/114.15.2 | BD Biosciences | mouse          |
| LIVE/DEAD™ Fixable Blue Dead Cell Stain Kit, for UV excitation          | na          | Thermo Fisher  | mouse          |
| Alexa Fluor® 647 anti-mouse CD206 <sup>1</sup>                          | MMR         | Biolegend      | mouse          |
| PE Mouse Anti-Mouse H-2Kb                                               | AF6-88.5    | BD Biosciences | mouse          |
| Phospho-p44/42 MAPK (Erk1/2) (Thr202/Tyr204) (D13.14.4E) XP® Rabbit mAb |             | Cell Signaling |                |
| p44/42 MAPK (Erk1/2) (L34F12) Mouse mAb                                 |             | Cell Signaling |                |
| Phospho-Stat1 (Ser727) (D3B7) Rabbit mAb                                |             | Cell Signaling |                |
| Stat1 (D1K9Y) Rabbit mAb                                                |             | Cell Signaling |                |
| Vinculin (E1E9V) XP® Rabbit mAb                                         |             | Cell Signaling |                |
| SP1 (D4C3) Rabbit mAb                                                   |             | Cell Signaling |                |
| Ezh2 (D2C9) XP® Rabbit mAb                                              |             | Cell Signaling |                |
| Histone H3 (D1H2) XP® Rabbit mAb                                        |             | Cell Signaling |                |
| Tri-Methyl-Histone H3 (Lys27) (C36B11) Rabbit mAb                       |             | Cell Signaling |                |

<sup>1</sup> Intracellular antibodies

Supplementary Table 4

| Vector name | gRNA Sequence                              | Source        | Identifier       |
|-------------|--------------------------------------------|---------------|------------------|
| mCiita_1    | AGCAGGCCAAGACTTACATG, TAGTCGAGCTGGCCAAGCTG | Vectorbuilder | VB210324-1175xee |
| mCiita_2    | CCCGGAGCCTTAGTCGAGCT, GAGACCCTATGACAACTGG  | Vectorbuilder | VB230124-1305eyk |
| mH2-ab1     | ACGGGACGCAGCGCATACGA, GGAGATCCTGGAGCGAACGC | Vectorbuilder | VB230124-1307xfy |

Supplementary Table 5

| Primer        | Sequence                  |
|---------------|---------------------------|
| mCiita_ Ex3F  | ATCTTCCAGCGGAAGCTACTGC    |
| mCiita_ Ex3R  | CCGGGTTTCTTGCAAGGTGC      |
| mCiita_ Ex10F | GGACTCTATGTCAGCCTGCTAGG   |
| mCiita_ Ex10R | TGGGCTCGAGGCTGGAAAAC      |
| mH2-ab1_ Ex2F | CCGCAGGGCATTTCGTGTAC      |
| mH2-ab1_ Ex2R | TCTCCGGCCCCTCGTAGTTGT     |
| mCD74_ FW     | AAGCAGTGGCTCTTGTTTGAG     |
| mCD74_ RV     | CTTCCATGTCCAGTGGCTCT      |
| mCiita_ FW    | AATCTACCACGGTGAGATGCCC    |
| mCiita_ RV    | TCGGGGAGACTGGGGATACTGA    |
| mH2-aa_ FW    | GAGCAGCTTCAGAGACCTCC      |
| mH2-aa_ RV    | CTACGTGGTCGGCCTCAAT       |
| mH2-ab1_ FW   | CACAGGAGTCAGAAAGGACCTC    |
| mH2-ab1_ RV   | TGGCAGTCAGGAATTCGGAG      |
| mH2-dma_ FW   | GAGATTGACCGCTACACGGCAA    |
| mH2-dma_ RV   | GAAGACAATGCCCATGATGGTGC   |
| mH2-dmb1_ FW  | AGAGCCTTCTCCAGCGTTTGCA    |
| mH2-dmb1_ RV  | TGTGGTTTGGGCTACTCGGACA    |
| mH2-dmb2_ FW  | ACCTTTCTGGGATGTGCTGACC    |
| mH2-dmb2_ RV  | GTGATGGTCACATCCGCTGGAT    |
| mRfxap_ FW    | ACGTCAAACCTGGAGGAAAGCAC   |
| mRfxap_ RV    | GAGTAGGTCTTGCAGGGCG       |
| mRfx5_ FW     | GGAAGACCTTGGTATCCATGCC    |
| mRfx5_ RV     | GGCTGCTTCTACCAGTTCATCC    |
| Rfxank_ FW    | GCACATGCCTGTCTGGAAAC      |
| Rfxank_ RV    | AGCAGGAAGCGAACTGTCTC      |
| Irf1_ FW      | CAAAGCCACCATGCCAATCACTCG  |
| Irf1_ RV      | GGCCCAGCTCCGGAACAGACAG    |
| mH2-k1_ FW    | GGAGCAGGAGGGGCCCGAGTATTG  |
| mH2-k1_ RV    | CGCCGTCCACGTTTTTCAGGTCTTC |
| mB2m_ FW      | TCACTGACCGGCTGTATGCTATC   |
| mB2m_ RV      | AATGTGAGGCGGGTGGAACTGT    |
